# Supplementary material
Source: MDPI journal article supplement (https://www.mdpi.com/2075-163X/9/1/8)
Supplement: s1 [file s1]

# **Distribution of Rare Earth Elements plus Yttrium among Major Mineral Phases of Marine Fe–Mn Crusts from the South China Sea and Western Pacific Ocean: A Comparative Study**

**Yingzhi Ren** <sup>1,2</sup>, **Xiaoming Sun** <sup>1,2,3,\*</sup>, **Yao Guan** <sup>2,4,\*</sup>, **Zhenglian Xiao** <sup>1,2</sup>, **Ying Liu** <sup>1,2</sup>, **Jianlin Liao** <sup>1,2</sup> and **Zhengxing Guo** <sup>1,2</sup>

<sup>1</sup> School of Marine Sciences, Sun Yat-sen University, Guangzhou 510006, China; renyzh@mail2.sysu.edu.cn (Y.R.); xiaozhl3@mail2.sysu.edu.cn (Z.X.); liuy476@mail.sysu.edu.cn (Y.L.); liaojlin@mail2.sysu.edu.cn (J.L.); guozhx7@mail2.sysu.edu.cn (Z.G.)

<sup>2</sup> Guangdong Provincial Key Laboratory of Marine Resources and Coastal Engineering, Guangzhou 510006, China

<sup>3</sup> School of Earth Science and Engineering, Sun Yat-sen University, Guangzhou 510275, China

<sup>4</sup> Fourth Institute of Oceanography, Ministry of Natural Resources, Beihai 536000, China

\* Correspondence: eessxm@mail.sysu.edu.cn (X.S.); guanyao@mail2.sysu.edu.cn (Y.G.); Tel./Fax: +86-020-84110968 (X.S. and Y.G.)

Received: 23 November 2018; Accepted: 19 December 2018; Published: 23 December 2018

**Table S1.** Concentrations of REY in the leaches and in bulk crusts investigated in this study.

| Sample   | Element                          | Elements of Individual Phases (ppm) |       |       |       | Sum of Leaches | Bulk  | Recovery (%) | Percentage Recovery of Individual Phases (%) |    |    |    |
|----------|----------------------------------|-------------------------------------|-------|-------|-------|----------------|-------|--------------|----------------------------------------------|----|----|----|
|          |                                  | L1                                  | L2    | L3    | L4    |                |       |              | L1                                           | L2 | L3 | L4 |
| ST1      | La                               | <0.01                               | 103.7 | 37.99 | 4.59  | 146.3          | 125.0 | 117          | 0                                            | 71 | 26 | 3  |
|          | Ce                               | <0.01                               | 387.5 | 393.6 | 12.59 | 793.7          | 598.3 | 133          | 0                                            | 49 | 50 | 2  |
|          | Pr                               | <0.01                               | 15.17 | 10.14 | 1.11  | 26.41          | 29.53 | 89           | 0                                            | 57 | 38 | 4  |
|          | Nd                               | <0.01                               | 58.77 | 40.79 | 4.42  | 103.98         | 126.3 | 82           | 0                                            | 57 | 39 | 4  |
|          | Sm                               | <0.01                               | 10.19 | 11.30 | 0.86  | 22.35          | 27.74 | 81           | 0                                            | 46 | 51 | 4  |
|          | Eu                               | <0.01                               | 2.61  | 3.45  | 0.22  | 6.28           | 6.94  | 90           | 0                                            | 42 | 55 | 4  |
|          | Gd                               | <0.01                               | 14.58 | 19.07 | 0.77  | 34.42          | 32.63 | 105          | 0                                            | 42 | 55 | 2  |
|          | Tb                               | <0.01                               | 1.80  | 3.86  | 0.11  | 5.78           | 6.26  | 92           | 0                                            | 31 | 67 | 2  |
|          | Dy                               | <0.01                               | 9.07  | 24.62 | 0.64  | 34.33          | 32.99 | 104          | 0                                            | 26 | 72 | 2  |
|          | Y                                | <0.01                               | 43.21 | 81.26 | 3.24  | 127.7          | 105.3 | 121          | 0                                            | 34 | 64 | 3  |
|          | Ho                               | <0.01                               | 1.77  | 5.08  | 0.13  | 6.99           | 6.13  | 114          | 0                                            | 25 | 73 | 2  |
|          | Er                               | <0.01                               | 4.71  | 14.86 | 0.41  | 19.97          | 17.24 | 116          | 0                                            | 24 | 74 | 2  |
|          | Tm                               | <0.01                               | 0.59  | 2.26  | 0.06  | 2.91           | 2.37  | 123          | 0                                            | 20 | 78 | 2  |
|          | Yb                               | <0.01                               | 3.39  | 14.77 | 0.41  | 18.58          | 15.20 | 122          | 0                                            | 18 | 80 | 2  |
|          | Lu                               | <0.01                               | 0.53  | 2.29  | 0.06  | 2.89           | 2.35  | 123          | 0                                            | 18 | 79 | 2  |
|          | ΣREY                             | <0.01                               | 657.6 | 665.4 | 29.63 | 1353           | 1134  | 119          | 0                                            | 49 | 49 | 2  |
|          | %HREY                            | 24.47                               | 12.51 | 25.78 | 20.46 | 19.21          | 20.05 |              |                                              |    |    |    |
|          | Ce/Ce*                           | 1.78                                | 2.18  | 4.58  | 1.28  | 2.90           | 2.25  |              |                                              |    |    |    |
|          | Eu/Eu*                           | 0.67                                | 0.96  | 1.03  | 1.25  | 1.00           | 1.06  |              |                                              |    |    |    |
|          | Y <sub>n</sub> /Ho <sub>n</sub>  | 1.66                                | 0.89  | 0.59  | 0.89  | 0.67           | 0.63  |              |                                              |    |    |    |
|          | La <sub>n</sub> /Yb <sub>n</sub> | 0.83                                | 2.25  | 0.19  | 0.82  | 0.58           | 0.61  |              |                                              |    |    |    |
| ZSQD253A | La                               | <0.01                               | 60.48 | 18.20 | 1.41  | 80.08          | 101.5 | 79           | 0                                            | 76 | 23 | 2  |
|          | Ce                               | <0.01                               | 309.6 | 197.5 | 5.97  | 513.0          | 744.2 | 69           | 0                                            | 60 | 38 | 1  |
|          | Pr                               | <0.01                               | 7.85  | 10.47 | 0.41  | 18.74          | 20.64 | 91           | 0                                            | 42 | 56 | 2  |

Minerals

|         |                                  |       |       |       |       |        |        |     |   |    |    |    |
|---------|----------------------------------|-------|-------|-------|-------|--------|--------|-----|---|----|----|----|
|         | Nd                               | <0.01 | 31.12 | 22.81 | 1.86  | 55.78  | 90.01  | 62  | 0 | 56 | 41 | 3  |
|         | Sm                               | <0.01 | 5.15  | 5.93  | 0.42  | 11.50  | 21.02  | 55  | 0 | 45 | 52 | 4  |
|         | Eu                               | <0.01 | 1.38  | 1.70  | 0.14  | 3.21   | 5.49   | 59  | 0 | 43 | 53 | 4  |
|         | Gd                               | <0.01 | 8.56  | 9.05  | 0.40  | 18.01  | 28.34  | 64  | 0 | 48 | 50 | 2  |
|         | Tb                               | <0.01 | 1.03  | 1.78  | 0.05  | 2.86   | 3.85   | 74  | 0 | 36 | 62 | 2  |
|         | Dy                               | <0.01 | 5.43  | 11.71 | 0.32  | 17.45  | 21.60  | 81  | 0 | 31 | 67 | 2  |
|         | Y                                | <0.01 | 33.88 | 42.21 | 1.58  | 77.67  | 87.51  | 89  | 0 | 44 | 54 | 2  |
|         | Ho                               | <0.01 | 1.16  | 2.50  | 0.07  | 3.73   | 4.38   | 85  | 0 | 31 | 67 | 2  |
|         | Er                               | <0.01 | 3.21  | 7.48  | 0.20  | 10.89  | 12.93  | 84  | 0 | 29 | 69 | 2  |
|         | Tm                               | <0.01 | 0.41  | 1.17  | 0.03  | 1.61   | 1.83   | 88  | 0 | 26 | 73 | 2  |
|         | Yb                               | <0.01 | 2.33  | 7.92  | 0.20  | 10.45  | 11.97  | 87  | 0 | 22 | 76 | 2  |
|         | Lu                               | <0.01 | 0.39  | 1.25  | 0.03  | 1.67   | 1.90   | 88  | 0 | 23 | 75 | 2  |
|         | ΣREY                             | <0.02 | 471.9 | 341.6 | 13.08 | 826.7  | 1157   | 71  | 0 | 57 | 41 | 2  |
|         | %HREY                            | 22.49 | 12.24 | 25.40 | 23.06 | 17.85  | 15.54  |     |   |    |    |    |
|         | Ce/Ce*                           | 2.39  | 3.12  | 2.97  | 1.79  | 3.03   | 3.72   |     |   |    |    |    |
|         | Eu/Eu*                           | 0.59  | 0.91  | 1.03  | 1.61  | 0.99   | 1.01   |     |   |    |    |    |
|         | Y <sub>n</sub> /Ho <sub>n</sub>  | 0.98  | 1.07  | 0.62  | 0.88  | 0.76   | 0.73   |     |   |    |    |    |
|         | La <sub>n</sub> /Yb <sub>n</sub> | 0.76  | 1.91  | 0.17  | 0.52  | 0.56   | 0.62   |     |   |    |    |    |
| ZSQD42A | La                               | <0.01 | 96.22 | 70.73 | 9.18  | 176.1  | 228.5  | 77  | 0 | 55 | 40 | 5  |
|         | Ce                               | <0.01 | 307.2 | 661.9 | 54.85 | 1024   | 959.0  | 107 | 0 | 30 | 65 | 5  |
|         | Pr                               | <0.01 | 10.16 | 20.35 | 2.77  | 33.28  | 39.80  | 84  | 0 | 31 | 61 | 8  |
|         | Nd                               | <0.01 | 38.47 | 76.49 | 12.37 | 127.33 | 168.77 | 75  | 0 | 30 | 60 | 10 |
|         | Sm                               | <0.01 | 5.87  | 17.88 | 2.56  | 26.31  | 38.29  | 69  | 0 | 22 | 68 | 10 |
|         | Eu                               | <0.01 | 1.57  | 6.00  | 0.52  | 8.09   | 9.46   | 85  | 0 | 19 | 74 | 6  |
|         | Gd                               | <0.01 | 9.64  | 38.61 | 2.05  | 50.30  | 46.11  | 109 | 0 | 19 | 77 | 4  |
|         | Tb                               | <0.01 | 1.03  | 4.23  | 0.19  | 5.45   | 6.34   | 86  | 0 | 19 | 78 | 4  |
|         | Dy                               | <0.01 | 3.46  | 23.49 | 0.78  | 27.74  | 33.85  | 82  | 0 | 12 | 85 | 3  |
|         | Y                                | <0.01 | 25.29 | 97.66 | 3.06  | 126.0  | 148.3  | 85  | 0 | 20 | 77 | 2  |

Minerals

|         |                                  |       |       |       |       |       |       |     |   |    |    |    |
|---------|----------------------------------|-------|-------|-------|-------|-------|-------|-----|---|----|----|----|
|         | Ho                               | <0.01 | 0.73  | 5.47  | 0.14  | 6.34  | 8.42  | 75  | 0 | 11 | 86 | 2  |
|         | Er                               | <0.01 | 1.91  | 17.02 | 0.40  | 19.33 | 23.83 | 81  | 0 | 10 | 88 | 2  |
|         | Tm                               | <0.01 | 0.23  | 2.61  | 0.06  | 2.89  | 3.27  | 88  | 0 | 8  | 90 | 2  |
|         | Yb                               | <0.01 | 1.22  | 16.88 | 0.39  | 18.49 | 20.63 | 90  | 0 | 7  | 91 | 2  |
|         | Lu                               | <0.01 | 0.19  | 2.59  | 0.06  | 2.84  | 3.14  | 90  | 0 | 7  | 91 | 2  |
|         | ΣREY                             | <0.01 | 503.2 | 1062  | 89.37 | 1655  | 1738  | 95  | 0 | 30 | 64 | 5  |
|         | %HREY                            | 21.15 | 9.00  | 20.21 | 8.55  | 16.17 | 17.46 |     |   |    |    |    |
|         | Ce/Ce*                           | 2.53  | 2.09  | 3.97  | 2.47  | 3.05  | 2.28  |     |   |    |    |    |
|         | Eu/Eu*                           | 0.70  | 0.92  | 0.95  | 1.05  | 0.95  | 1.03  |     |   |    |    |    |
|         | Y <sub>n</sub> /Ho <sub>n</sub>  | 0.76  | 1.28  | 0.65  | 0.81  | 0.73  | 0.65  |     |   |    |    |    |
|         | La <sub>n</sub> /Yb <sub>n</sub> | 0.56  | 5.80  | 0.31  | 1.74  | 0.70  | 0.82  |     |   |    |    |    |
| HYD66-2 | La                               | <0.01 | 80.45 | 41.87 | 36.45 | 158.8 | 222.9 | 71  | 0 | 51 | 26 | 23 |
|         | Ce                               | <0.01 | 619.7 | 759.9 | 299.8 | 1679  | 1552  | 108 | 0 | 37 | 45 | 18 |
|         | Pr                               | <0.01 | 13.06 | 20.79 | 11.60 | 45.45 | 49.33 | 92  | 0 | 29 | 46 | 26 |
|         | Nd                               | <0.01 | 47.03 | 82.02 | 52.43 | 181.5 | 200.6 | 90  | 0 | 26 | 45 | 29 |
|         | Sm                               | <0.01 | 6.63  | 20.70 | 10.90 | 38.23 | 45.12 | 85  | 0 | 17 | 54 | 29 |
|         | Eu                               | <0.01 | 2.10  | 6.03  | 2.15  | 10.29 | 10.91 | 94  | 0 | 20 | 59 | 21 |
|         | Gd                               | <0.01 | 12.07 | 33.30 | 8.99  | 54.37 | 54.07 | 101 | 0 | 22 | 61 | 17 |
|         | Tb                               | <0.01 | 1.23  | 3.47  | 0.70  | 5.40  | 7.10  | 76  | 0 | 23 | 64 | 13 |
|         | Dy                               | <0.01 | 2.95  | 21.93 | 1.97  | 26.84 | 36.48 | 74  | 0 | 11 | 82 | 7  |
|         | Y                                | <0.01 | 17.20 | 60.32 | 3.05  | 80.58 | 98.03 | 82  | 0 | 21 | 75 | 4  |
|         | Ho                               | <0.01 | 0.60  | 4.41  | 0.25  | 5.27  | 6.82  | 77  | 0 | 11 | 84 | 5  |
|         | Er                               | <0.01 | 1.61  | 12.76 | 0.54  | 14.91 | 19.14 | 78  | 0 | 11 | 86 | 4  |
|         | Tm                               | <0.01 | 0.20  | 1.90  | 0.05  | 2.15  | 2.67  | 80  | 0 | 9  | 89 | 2  |
|         | Yb                               | <0.01 | 1.07  | 12.32 | 0.27  | 13.66 | 16.89 | 81  | 0 | 8  | 90 | 2  |
|         | Lu                               | <0.01 | 0.17  | 1.86  | 0.04  | 2.07  | 2.54  | 82  | 0 | 8  | 90 | 2  |
|         | ΣREY                             | <0.01 | 806.1 | 1084  | 429.2 | 2319  | 2324  | 100 | 0 | 35 | 47 | 19 |
|         | %HREY                            | 19.32 | 4.86  | 14.61 | 4.20  | 9.29  | 10.96 |     |   |    |    |    |

Minerals

|           |                                  |       |       |       |       |       |       |     |   |    |    |    |
|-----------|----------------------------------|-------|-------|-------|-------|-------|-------|-----|---|----|----|----|
|           | Ce/Ce*                           | 2.54  | 4.31  | 5.50  | 3.30  | 4.50  | 3.39  |     |   |    |    |    |
|           | Eu/Eu*                           | 0.50  | 1.01  | 1.01  | 1.01  | 1.01  | 1.01  |     |   |    |    |    |
|           | Y <sub>n</sub> /Ho <sub>n</sub>  | 0.96  | 1.04  | 0.50  | 0.45  | 0.56  | 0.53  |     |   |    |    |    |
|           | La <sub>n</sub> /Yb <sub>n</sub> | 0.46  | 5.55  | 0.25  | 9.98  | 0.86  | 0.97  |     |   |    |    |    |
| NASD44-1  | La                               | <0.01 | 55.32 | 89.28 | 59.78 | 204.4 | 237.4 | 86  | 0 | 27 | 44 | 29 |
|           | Ce                               | 0.01  | 94.33 | 399.1 | 278.7 | 772.2 | 924.7 | 84  | 0 | 12 | 52 | 36 |
|           | Pr                               | <0.01 | 3.68  | 16.66 | 15.46 | 35.80 | 45.01 | 80  | 0 | 10 | 47 | 43 |
|           | Nd                               | <0.01 | 12.91 | 68.61 | 69.97 | 151.5 | 187.0 | 81  | 0 | 9  | 45 | 46 |
|           | Sm                               | <0.01 | 1.71  | 15.42 | 13.00 | 30.13 | 38.27 | 79  | 0 | 6  | 51 | 43 |
|           | Eu                               | <0.01 | 0.74  | 4.56  | 2.76  | 8.07  | 9.95  | 81  | 0 | 9  | 57 | 34 |
|           | Gd                               | <0.01 | 3.47  | 24.20 | 11.44 | 39.11 | 49.78 | 79  | 0 | 9  | 62 | 29 |
|           | Tb                               | <0.01 | 0.40  | 4.49  | 0.96  | 5.86  | 6.95  | 84  | 0 | 7  | 77 | 16 |
|           | Dy                               | <0.01 | 2.28  | 29.09 | 3.00  | 34.36 | 40.35 | 85  | 0 | 7  | 85 | 9  |
|           | Y                                | <0.01 | 20.51 | 108.0 | 5.49  | 134.0 | 146.5 | 92  | 0 | 15 | 81 | 4  |
|           | Ho                               | <0.01 | 0.55  | 6.30  | 0.39  | 7.25  | 8.36  | 87  | 0 | 8  | 87 | 5  |
|           | Er                               | <0.01 | 1.58  | 18.69 | 0.84  | 21.11 | 24.76 | 85  | 0 | 8  | 89 | 4  |
|           | Tm                               | <0.01 | 0.20  | 2.86  | 0.07  | 3.12  | 3.61  | 86  | 0 | 6  | 91 | 2  |
|           | Yb                               | <0.01 | 1.13  | 18.62 | 0.38  | 20.12 | 23.40 | 86  | 0 | 6  | 93 | 2  |
|           | Lu                               | <0.01 | 0.20  | 2.88  | 0.05  | 3.13  | 3.65  | 86  | 0 | 6  | 92 | 2  |
|           | ΣREY                             | 0.01  | 199.0 | 808.8 | 462.3 | 1470  | 1750  | 84  | 0 | 14 | 55 | 31 |
|           | %HREY                            | 18.02 | 15.61 | 27.16 | 5.49  | 18.78 | 18.13 |     |   |    |    |    |
|           | Ce/Ce*                           | 2.02  | 1.26  | 2.36  | 2.10  | 2.05  | 2.04  |     |   |    |    |    |
|           | Eu/Eu*                           | 0.47  | 1.28  | 1.04  | 1.05  | 1.06  | 1.03  |     |   |    |    |    |
|           | Y <sub>n</sub> /Ho <sub>n</sub>  | 0.81  | 1.36  | 0.63  | 0.51  | 0.68  | 0.64  |     |   |    |    |    |
|           | La <sub>n</sub> /Yb <sub>n</sub> | 1.16  | 3.62  | 0.35  | 11.67 | 0.75  | 0.75  |     |   |    |    |    |
| MP4SD24-1 | La                               | 0.04  | 88.18 | 79.59 | 40.42 | 208.2 | 181.8 | 115 | 0 | 42 | 38 | 19 |
|           | Ce                               | 0.21  | 184.3 | 431.4 | 214.2 | 830.2 | 883.1 | 94  | 0 | 22 | 52 | 26 |
|           | Pr                               | 0.01  | 4.76  | 12.19 | 9.16  | 26.11 | 30.37 | 86  | 0 | 18 | 47 | 35 |

Minerals

|                                  |       |       |       |       |       |       |     |   |    |    |    |
|----------------------------------|-------|-------|-------|-------|-------|-------|-----|---|----|----|----|
| Nd                               | 0.03  | 18.09 | 46.98 | 43.02 | 108.1 | 130.4 | 83  | 0 | 17 | 43 | 40 |
| Sm                               | 0.01  | 2.38  | 9.76  | 7.99  | 20.14 | 25.34 | 79  | 0 | 12 | 48 | 40 |
| Eu                               | <0.01 | 1.23  | 3.29  | 1.63  | 6.16  | 7.21  | 85  | 0 | 20 | 53 | 27 |
| Gd                               | 0.01  | 5.07  | 21.87 | 7.05  | 33.99 | 33.75 | 101 | 0 | 15 | 64 | 21 |
| Tb                               | <0.01 | 0.23  | 2.41  | 0.57  | 3.21  | 3.51  | 91  | 0 | 7  | 75 | 18 |
| Dy                               | 0.01  | 1.30  | 20.21 | 1.82  | 23.35 | 23.53 | 99  | 0 | 6  | 87 | 8  |
| Y                                | 0.03  | 14.19 | 97.17 | 5.11  | 116.5 | 123.0 | 95  | 0 | 12 | 83 | 4  |
| Ho                               | <0.01 | 0.33  | 5.00  | 0.27  | 5.59  | 6.19  | 90  | 0 | 6  | 89 | 5  |
| Er                               | <0.01 | 0.96  | 16.24 | 0.65  | 17.85 | 20.13 | 89  | 0 | 5  | 91 | 4  |
| Tm                               | <0.01 | 0.12  | 2.53  | 0.07  | 2.72  | 2.86  | 95  | 0 | 4  | 93 | 2  |
| Yb                               | <0.01 | 0.67  | 16.60 | 0.40  | 17.68 | 18.89 | 94  | 0 | 4  | 94 | 2  |
| Lu                               | <0.01 | 0.12  | 2.64  | 0.06  | 2.82  | 3.22  | 88  | 0 | 4  | 94 | 2  |
| ΣREY                             | 0.35  | 321.9 | 767.9 | 332.4 | 1423  | 1493  | 95  | 0 | 23 | 54 | 23 |
| %HREY                            | 16.81 | 7.52  | 24.48 | 5.30  | 16.16 | 16.22 |     |   |    |    |    |
| Ce/Ce*                           | 2.78  | 1.61  | 3.10  | 2.55  | 2.46  | 2.68  |     |   |    |    |    |
| Eu/Eu*                           | 0.98  | 1.48  | 0.93  | 1.01  | 1.03  | 1.11  |     |   |    |    |    |
| Y <sub>n</sub> /Ho <sub>n</sub>  | 0.79  | 1.59  | 0.71  | 0.70  | 0.76  | 0.73  |     |   |    |    |    |
| La <sub>n</sub> /Yb <sub>n</sub> | 0.76  | 9.70  | 0.35  | 7.36  | 0.87  | 0.71  |     |   |    |    |    |

---

**Table S2.** Correlation coefficient matrix for the growth rate and REY in different mineral phases.

|             | Growth rate | Total REY | REY in L2 | REY in L3 | REY in L4 |
|-------------|-------------|-----------|-----------|-----------|-----------|
| Growth rate | 1           |           |           |           |           |
| Total REY   | −0.84       | 1         |           |           |           |
| REY in L2   | 0.18        | 0.22      | 1         |           |           |
| REY in L3   | −0.71       | 0.91      | 0.17      | 1         |           |
| REY in L4   | −0.77       | 0.79      | −0.22     | 0.66      | 1         |

**Note:** please find Table S3 in File 2.

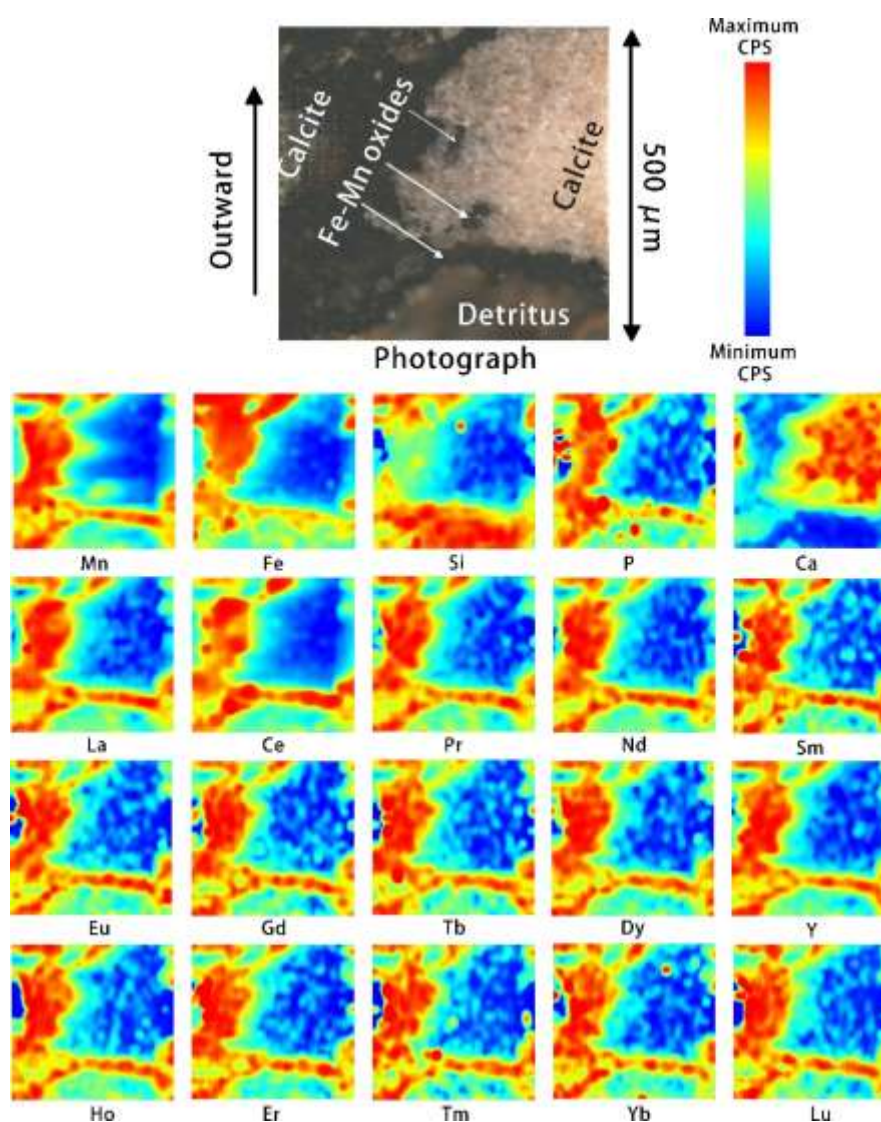

**Figure S1.** Microscope photograph of sample ST1 and the elemental maps determined by LA-ICP-MS.

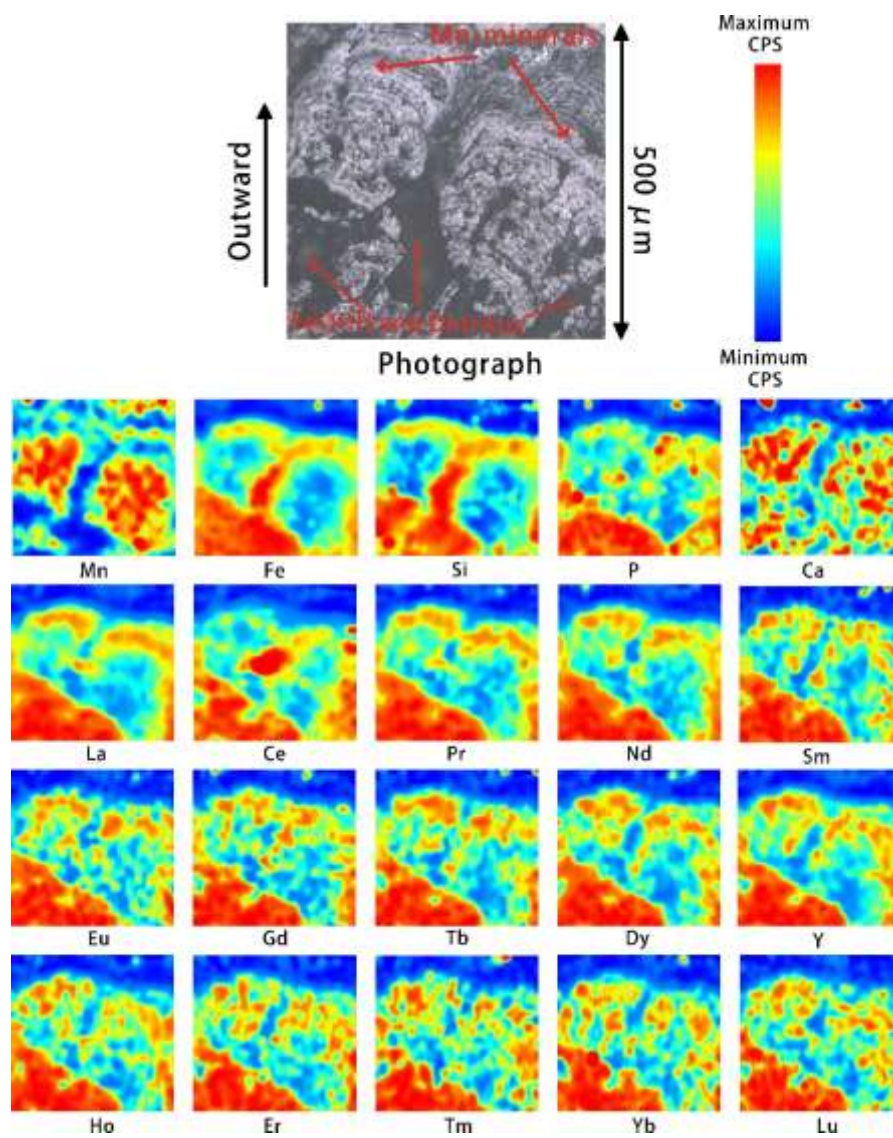

**Figure S2.** Microscope photograph of sample HYD66-2 and the elemental maps determined by LA-ICP-MS.



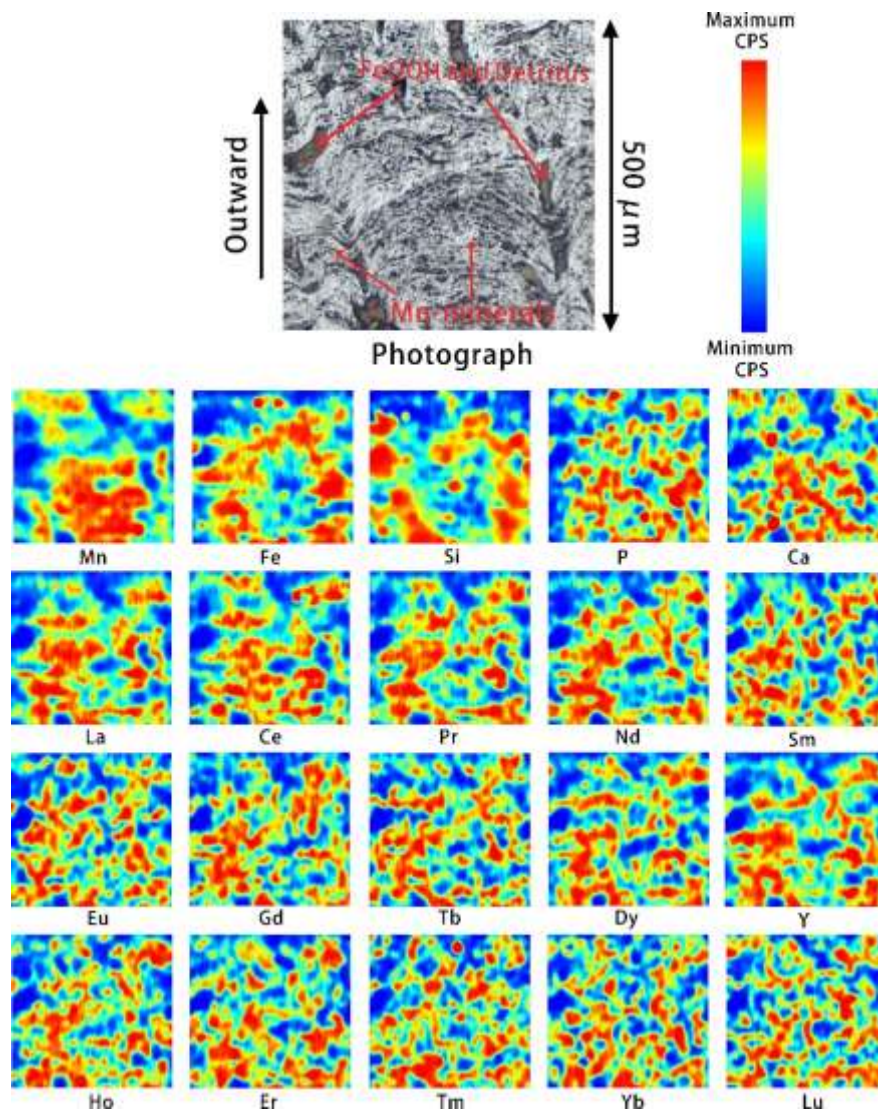

**Figure S3.** Microscope photograph of sample NASD44-1 and the elemental maps determined by LA-ICP-MS.
